# Supplementary material for: Global Carrier Rates of Rare Inherited Disorders Using Population Exome Sequences
Source: PubMed Central journal article supplement (PMC4878778; doi:10.1371/journal.pone.0155552), 2016-05-24

(a)  $\sigma=0$

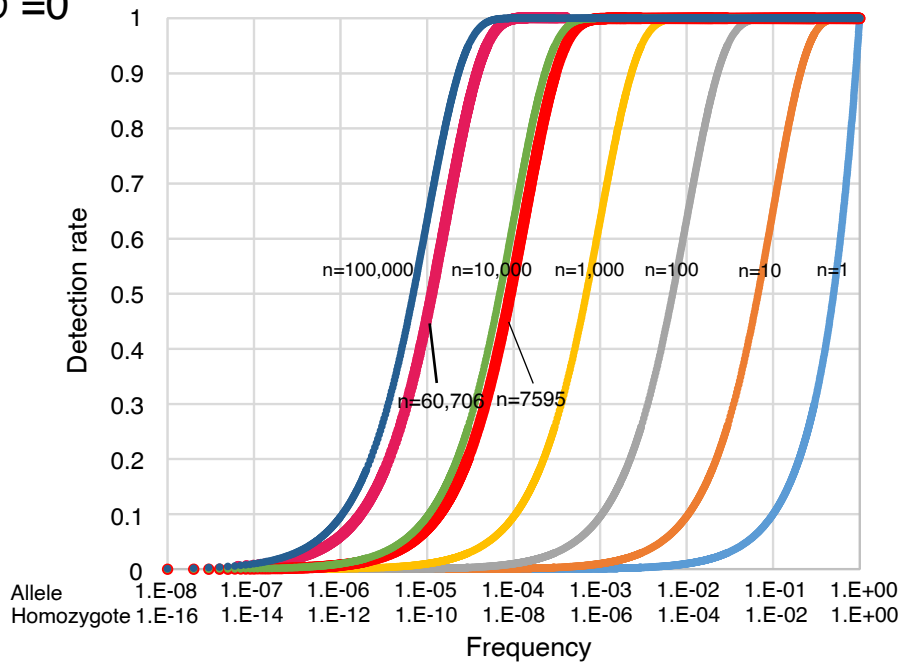

(b)  $\sigma=0.01$

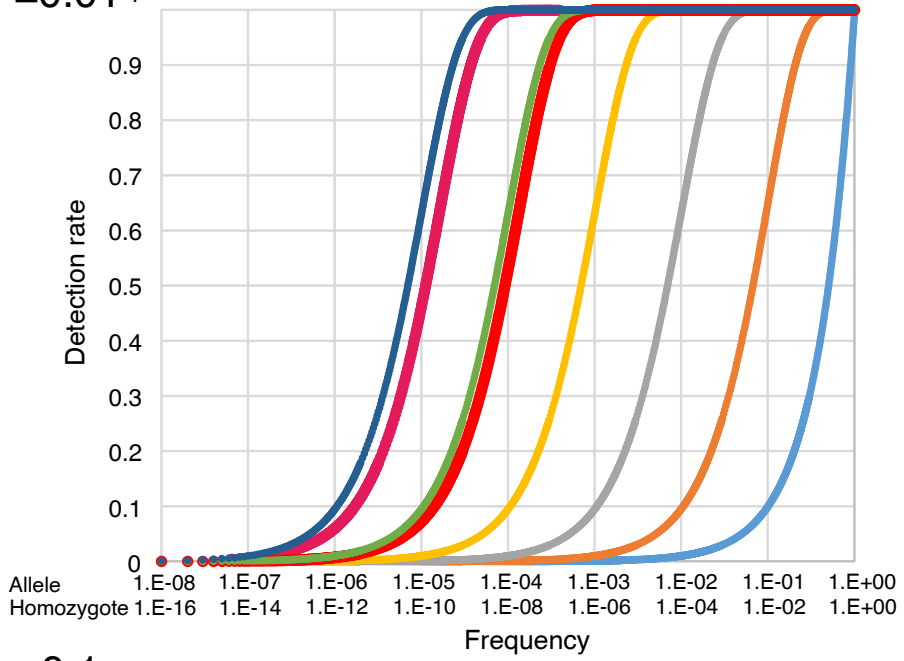

(c)  $\sigma=0.1$

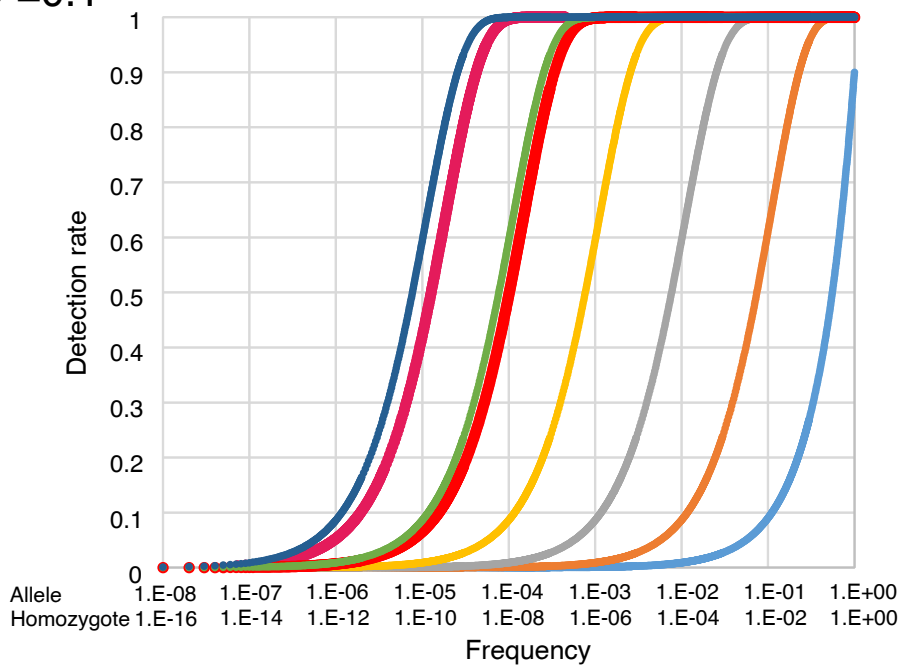

Supplement: pone.0155552.s001.pdf [file pone.0155552.s001.pdf]
