# Supplementary material for: Global Carrier Rates of Rare Inherited Disorders Using Population Exome Sequences
Source: PubMed Central journal article supplement (PMC4878778; doi:10.1371/journal.pone.0155552), 2016-05-24
Supplement: pone.0155552.s002.pdf [file pone.0155552.s002.pdf]

|              |            | Total |      |          |            |                     |      |
|--------------|------------|-------|------|----------|------------|---------------------|------|
|              | Population | No.   | %    | male No. | female No. | male/female ratio % |      |
| 1000 Genomes | AFR        | 246   | 22.5 | 115      | 131        | 46.7                |      |
|              | AMR        | 181   | 16.6 | 88       | 93         | 48.6                |      |
|              | ASN        | 286   | 26.2 | 144      | 142        | 50.3                |      |
|              | EUR        | 379   | 34.7 | 178      | 201        | 47.0                |      |
|              | ASW        | 61    | 5.59 | 24       | 37         | 39.3                |      |
|              | CEU        | 85    | 7.78 | 45       | 40         | 52.9                |      |
|              | CHB        | 97    | 8.88 | 44       | 53         | 45.4                |      |
|              | CHS        | 100   | 9.16 | 50       | 50         | 50.0                |      |
|              | CLM        | 60    | 5.49 | 29       | 31         | 48.3                |      |
|              | FIN        | 93    | 8.52 | 35       | 58         | 37.6                |      |
|              | GBR        | 89    | 8.15 | 41       | 48         | 46.1                |      |
|              | IBS        | 14    | 1.28 | 7        | 7          | 50.0                |      |
|              | JPT        | 89    | 8.15 | 50       | 39         | 56.2                |      |
|              | LWK        | 97    | 8.88 | 48       | 49         | 49.5                |      |
|              | MXL        | 66    | 6.04 | 31       | 35         | 47.0                |      |
|              | PUR        | 55    | 5.04 | 28       | 27         | 50.9                |      |
|              | TSI        | 98    | 8.97 | 50       | 48         | 51.0                |      |
|              | YRI        | 88    | 8.06 | 43       | 45         | 48.9                |      |
|              | NHLBI      | EA    | 4300 | 66.1     | 1872       | 2428                | 43.5 |
|              |            | AA    | 2203 | 33.9     | 571        | 1632                | 25.9 |
| Total        |            | 7595  |      | 2968     | 4627       | 39.1                |      |
