# Supplementary material for: Global Carrier Rates of Rare Inherited Disorders Using Population Exome Sequences
Source: PubMed Central journal article supplement (PMC4878778; doi:10.1371/journal.pone.0155552), 2016-05-24
Supplement: pone.0155552.s003.pdf [file pone.0155552.s003.pdf]

| Disease name                                                                                                                            | Gene name                                               | Gene ID      | Amino acid/nucleotide change                                                                                                                                                                                                                                                          | dbSNP ID                                                                                                                                           |
|-----------------------------------------------------------------------------------------------------------------------------------------|---------------------------------------------------------|--------------|---------------------------------------------------------------------------------------------------------------------------------------------------------------------------------------------------------------------------------------------------------------------------------------|----------------------------------------------------------------------------------------------------------------------------------------------------|
| 1 Sickle cell anemia (MIM#603903)                                                                                                       | <i>HBB</i> (hemoglobin, beta)                           | NM_000518.4  | p.Glu7Val                                                                                                                                                                                                                                                                             | rs77121243                                                                                                                                         |
| 2 Primary immunodeficiency (Mucocutaneous fungal infections) (MIM#613)                                                                  | <i>CLECTA</i> (C-type lectin domain family 7, member 1) | NM_197947.2  | p.Tyr238*                                                                                                                                                                                                                                                                             | rs16910526                                                                                                                                         |
| 3 PROP1-related combined pituitary hormone deficiency (CPHD) (MIM#26)                                                                   | <i>PROP1</i> (paired like homeodomain factor 1)         | NM_006261.4  | c.112_124del<br>c.149delGA<br>c.150delA<br>c.157delA<br>p.Arg73Cys<br>p.Arg73His<br>p.Gln83*<br>p.Phe88Ser<br>c.296delGA<br>p.Arg99*<br>p.Arg99Gln<br>p.Leu102Cysfs*8<br>c.310delC<br>p.Arg112*<br>c.343-11C>G<br>p.Phe117Ile<br>p.Arg120Cys<br>p.Arg125Trp<br>c.467insT<br>p.Trp194* | rs121917843<br>rs121917842<br>rs121917841<br>rs121917844<br>rs137853100<br>rs193922688<br>rs121917840<br>rs121917839<br>rs146918863<br>rs121917845 |
| 4 Canavan disease (#271900)                                                                                                             | <i>ASPA</i> (aspartoacylase)                            | NM_000049.2  | c.32delT<br>p.Glu24Gly<br>p.Arg71His<br>c.433-2A>G<br>p.Cys152Arg<br>p.Cys218*<br>p.Tyr231*<br>p.Asp249Val<br>p.Glu285Ala<br>c.876delAGAA<br>p.Ala305Glu                                                                                                                              | rs104894551<br>rs104894553<br>rs104894548<br>rs104894549<br>rs12948217<br>rs104894552<br>rs28940279<br>rs28940574<br>rs116107386                   |
| 5 Pustular psoriasis (MIM no description)                                                                                               | <i>APIS3</i> (adaptor-related protein complex 1, sigma) | NM_001039569 | p.Phe4Cys<br>p.Gln17Lys<br>p.Thr22Ala<br>p.Thr32Ile<br>p.Arg33Trp<br>p.Ile83Thr                                                                                                                                                                                                       | rs149183052<br>rs78536455<br>rs138292988<br>rs202157374                                                                                            |
| 6 Rod-cone dystrophy (RCD) (MIM#615780)                                                                                                 | <i>PLK1S1</i> (polo-like kinase 1 substrate 1)          | NM_018474.4  | p.Glu18*<br>p.Lys40Ilefs*14<br>p.Arg76*                                                                                                                                                                                                                                               | rs58777376<br>rs58777377<br>rs202210819                                                                                                            |
| 7 Primary autosomal recessive microcephaly 1 (MIM#251200)                                                                               | <i>MCPH1</i> (microcephalin 1)                          | NM_024596.3  | p.Ser25*<br>p.Tyr27Arg<br>p.Gln46*<br>p.His49Gln<br>p.Ser72Leu<br>p.Trp75Arg<br>p.Ser101*<br>c.436+1G>T<br>p.Thr143Asnfs<br>c.566Ains                                                                                                                                                 | rs121434305<br>rs199422124<br>rs387906961<br>rs199422125                                                                                           |
| 8 Seckel syndrome 5 (SCKL5) (MIM#613823)                                                                                                | <i>CEP152</i> (centrosomal protein 152kDa)              | NM_001194998 | p.Pro65Alafs*81<br>p.Lys667Arg<br>p.Tyr678*<br>p.Ile899Leufs*29<br>p.Val1404fs*2                                                                                                                                                                                                      | rs200879436<br>rs182018947                                                                                                                         |
| 9 Pontocerebellar hypoplasia type 1B (PCH1B) (MIM#614678)                                                                               | <i>EXOSC3</i> (exosome component 3)                     | NM_001002269 | c.2T>C<br>p.Gly31Ala<br>p.Pro52fs<br>p.Asp76fs<br>c.294_303del<br>p.Tyr109Asn<br>p.Asp132Ala<br>p.Gly135Gln<br>p.Ala139Pro<br>c.475-1269A>G<br>p.Val80Phe<br>p.Trp238Arg                                                                                                              | rs387907196<br>rs141138948<br>rs387907195<br>rs370087266<br>rs374550999                                                                            |
| 10 Miller syndrome (MIM#263750)                                                                                                         | <i>DHODH</i> (dihydroorotate dehydrogenase)             | NM_001361.4  | p.Gly19Glu<br>p.Glu52Gly<br>p.Arg135Cys<br>p.Gly152Arg<br>p.Arg199Cys<br>p.Gly202Ala<br>p.Gly202Asp<br>p.Leu204Profs*8<br>p.Arg244Trp<br>p.The284Ile<br>p.Arg326*<br>p.Arg346Trp<br>p.Ala357Thr<br>p.Asp392Gly                                                                        | rs267606765<br>rs201230446<br>rs267606766<br>rs267606769<br>rs267606767<br>rs267606768<br>rs201947120                                              |
| 11 Facial dysmorphism, lens dislocation, anterior-segment abnormalities, and spontaneous filtering blebs (FDLAB, or Traboulsi syndrome) | <i>ASPH</i> (aspartate beta-hydroxylase)                | NM_004318.3  | p.Asn618Glyfs*20<br>p.Arg735Trp                                                                                                                                                                                                                                                       | rs374385878                                                                                                                                        |
| 12 Carpenter syndrome (MIM#201000)                                                                                                      | <i>RAB23</i> (RAB23, member RAS oncogene family)        | NM_016277.4  | p.Met12Lys<br>p.Arg28*<br>p.Tyr29*<br>p.Glu48fs*7<br>p.Val53fs*13<br>p.Tyr78fs*30<br>p.Tyr79del<br>p.Cys85Arg<br>p.Asn121fs*4<br>p.Glu137*<br>p.Leu145*<br>c.482-1G>A                                                                                                                 | rs121908171                                                                                                                                        |
| 13 Familial glucocorticoid deficiency (FGD) (MIM#614736)                                                                                | <i>NNT</i> (nicotinamide nucleotide transhydrogenase)   | NM_012343.3  | c.1A>G<br>p.Ser22Profs*6<br>p.Ser193Asn<br>p.Tyr201Lysfs*1<br>p.Phe215Ser<br>p.Thr357Ala<br>p.His365Pro<br>p.His370*<br>p.Gln383*<br>p.Pro437Leu<br>p.Gln452Argfs*44<br>p.Ala533Val<br>p.Gln557*                                                                                      |                                                                                                                                                    |

|    |                                                                                                 |                                                                       |                                                                                                                                                                                                                                                                                                            |                                                                             |
|----|-------------------------------------------------------------------------------------------------|-----------------------------------------------------------------------|------------------------------------------------------------------------------------------------------------------------------------------------------------------------------------------------------------------------------------------------------------------------------------------------------------|-----------------------------------------------------------------------------|
|    |                                                                                                 |                                                                       | p.Ile622Aspfs*1<br>p.Gly664Arg<br>p.Gly678Arg<br>p.Thr689Leufs*320<br>p.Met880*<br>p.Leu977Pro<br>p.Alala1008Pro<br>p.Asn1009Lys                                                                                                                                                                           | rs371979800                                                                 |
| 14 | childhood-onset dilated cardiomyopathy (MIM no description)                                     | <i>RAF1</i> (Raf-1 proto-oncogene, serine/threonine kin; NM_002880.3) | p.Ala237Thr<br>p.Arg254fs<br>p.Thr310Ala<br>p.Pro332Ala<br>p.Leu603Pro<br>p.His626Arg<br>p.Thr641Met                                                                                                                                                                                                       |                                                                             |
| 15 | Usher syndrome type 1J (USH1J) (#614869)                                                        | <i>CIB2</i> (calcium and integrin binding family member NM_006383.2)  | p.Glu64Asp<br>p.Phe91Ser<br>p.Cys99Trp<br>p.Ile123Thr                                                                                                                                                                                                                                                      | rs145415848<br>rs397515411<br>rs370965183<br>rs397515412                    |
| 16 | Aicardi-Goutières syndrome 6 (#615010)                                                          | <i>ADAR</i> (adenosine deaminase, RNA-specific) NM_001111.4           | p.Pro193Ala<br>p.Lys359Argfs*14<br>p.Phe535fs*<br>p.Arg544*<br>p.Ala870Thr<br>p.Ile872Thr<br>p.Arg892His<br>p.Lys999Asn<br>p.Gly1007Arg<br>p.Tyr1112Phe<br>p.Asp1113His                                                                                                                                    | rs145588689<br>rs398122898<br><br>rs398122893<br>rs398122897<br>rs398122892 |
| 17 | MEGDEL syndrome (MIM#614739)                                                                    | <i>SERAC1</i> (serine active site containing 1) NM_032861.3           | c.128 +4A>G<br>p.Arg68*<br>p.Arg148*<br>p.Ser156fsCys*16<br>p.Leu193Serfs*9<br>c.698-9TG>AGTGATA<br>c.1018delT<br>p.Gln390Profs*29<br>p.Gly401Asp<br>p.Gly404Glu<br>p.Trp438*<br>c.1403+1G>C<br>p.Leu479del<br>p.Ser498Thr<br>p.Gly536Ilefs*56<br>p.Ser543Phefs*44<br>c.1822_1828+10delTCAGCA<br>p.Gln642* | rs387907236                                                                 |
| 18 | severe dermatitis, multiple allergies and metabolic wasting (SAM syndrome) (MIM no description) | <i>DSG1</i> (desmoglein 1) NM_001942.3                                | c.49-1G>A<br>p.Ala621Glnfs*3<br>p.Arg887*                                                                                                                                                                                                                                                                  |                                                                             |
