# Supplementary material for: Global Carrier Rates of Rare Inherited Disorders Using Population Exome Sequences
Source: PubMed Central journal article supplement (PMC4878778; doi:10.1371/journal.pone.0155552), 2016-05-24
Supplement: pone.0155552.s004.pdf [file pone.0155552.s004.pdf]

|                 |                    |                                                           |                                                  |                                                                                                                                      |                              |                                            |                                     |                   |                   |
|-----------------|--------------------|-----------------------------------------------------------|--------------------------------------------------|--------------------------------------------------------------------------------------------------------------------------------------|------------------------------|--------------------------------------------|-------------------------------------|-------------------|-------------------|
|                 |                    | 1                                                         | 2                                                | 3                                                                                                                                    | 4                            | 5                                          |                                     |                   |                   |
| Disease name    | Sickle cell anemia | Primary immunodeficiency (Mucocutaneous fungal infection) | Pituitary hormone deficiency, combined 2 (CPHD2) | Canavan disease                                                                                                                      |                              | Pustular psoriasis                         |                                     |                   |                   |
| OMIM entry      | #603903            | #613108                                                   | #262600                                          | #271900                                                                                                                              |                              |                                            |                                     |                   |                   |
| Gene name       | <i>HBB</i>         | <i>CLEC7A</i>                                             | <i>PROPI</i>                                     | <i>ASPA</i>                                                                                                                          |                              | <i>APIS3</i>                               |                                     |                   |                   |
| dbSNP           | rs77121243         | rs16910526                                                | rs193922688                                      | rs28940279                                                                                                                           | rs28940574                   | rs116107386                                | rs149183052                         | rs78536455        |                   |
| European origin | NHLBI EA           | 0.00023 (2/8596)                                          | 0.0790 (679/8600)                                | 0.0011 (9/8254)                                                                                                                      | 0.00023 (2/8600)             | 0.00023 (2/8600)                           | 0.0128 (105/8232)                   | 0.0013 (11/8188)  | 0.0069 (57/8280)  |
|                 | 1000 Genomes EUR   | 0 (0/758)                                                 | 0.067 (51/758)                                   | 0 (0/758)                                                                                                                            | 0 (0/758)                    | 0 (0/758)                                  | 0.011 (8/758)                       | 0.003 (2/758)     | 0.007 (5/758)     |
|                 | p-value            | 1                                                         | 0.28                                             | 0.757                                                                                                                                | 1                            | 1                                          | 0.726                               | 0.397             | 1                 |
| African origin  | NHLBI AA           | 0.0402 (177/4402)                                         | 0.0263 (116/4406)                                | 0 (0/4264)                                                                                                                           | 0.00023 (1/4406)             | 0 (0/4406)                                 | 0.0027 (10/3764)                    | 0.00054 (2/3726)  | 0.00027 (1/3702)  |
|                 | 1000 Genomes AFR   | 0.091 (45/492)                                            | 0.014 (7/492)                                    | 0 (0/492)                                                                                                                            | 0 (0/492)                    | 0 (0/492)                                  | 0.004 (2/492)                       | 0 (0/492)         | 0 (0/492)         |
|                 | p-value            | <b>4.04E-07</b>                                           | 0.14                                             | 1                                                                                                                                    | 1                            | 1                                          | 0.919                               | 1                 | 1                 |
|                 |                    |                                                           | 6                                                | 7                                                                                                                                    | 8                            | 9                                          |                                     |                   |                   |
| Disease name    |                    | Rod-cone dystrophy (RCD)                                  | Primary autosomal recessive microcephaly 1       | Seckel syndrome 5 (SCKL5)                                                                                                            |                              | Pontocerebellar hypoplasia type 1B (PCH1B) |                                     |                   |                   |
| OMIM entry      |                    | #615780                                                   | #251200                                          | #613823                                                                                                                              |                              | #614678                                    |                                     |                   |                   |
| Gene name       |                    | <i>PLK1S1</i>                                             | <i>MCPHI</i>                                     | <i>CEP152</i>                                                                                                                        |                              | <i>EXOSC3</i>                              |                                     |                   |                   |
| dbSNP           | rs138292988        | rs202210819                                               | rs121434305                                      | rs200879436                                                                                                                          | rs182018947                  | rs374550999                                | rs141138948                         | rs370087266       |                   |
| European origin | NHLBI EA           | 0.0116 (95/8174)                                          | 0.00061 (5/8180)                                 | 0.00012 (1/8222)                                                                                                                     | 0.00012 (1/8230)             | 0.00024 (2/8366)                           | 0.00012 (1/8586)                    | 0.0013 (11/8600)  | 0.00012 (1/8600)  |
|                 | 1000 Genomes EUR   | 0.008 (6/758)                                             | 0 (0/758)                                        | 0 (0/758)                                                                                                                            | 0 (0/758)                    | 0 (0/758)                                  | 0 (0/758)                           | 0 (0/758)         | 0 (0/758)         |
|                 | p-value            | 0.457                                                     | 1                                                | 1                                                                                                                                    | 1                            | 1                                          | 1                                   | 0.432             | 1                 |
| African origin  | NHLBI AA           | 0.0019 (7/3696)                                           | 0 (0/3660)                                       | 0 (0/3754)                                                                                                                           | 0.0129 (49/3812)             | 0.0018 (7/3976)                            | 0 (0/4384)                          | 0 (0/4406)        | 0 (0/4406)        |
|                 | 1000 Genomes AFR   | 0 (0/492)                                                 | 0 (0/492)                                        | 0 (0/492)                                                                                                                            | 0.012 (6/492)                | 0.002 (1/492)                              | 0 (0/492)                           | 0 (0/492)         | 0 (0/492)         |
|                 | p-value            | 0.704                                                     | 1                                                | 1                                                                                                                                    | 1                            | 1                                          | 1                                   | 1                 | 1                 |
|                 |                    | 10                                                        |                                                  | 11                                                                                                                                   | 12                           | 13                                         | 14                                  | 15                |                   |
| Disease name    | Miller syndrome    |                                                           |                                                  | Facial dysmorphism, lens dislocation, anterior-segment abnormalities, and spontaneous filtering blebs (FDLAB, or Traboulsi syndrome) | Carpenter syndrome 1 (CRPT1) | Glucocorticoid deficiency 4 (GCCD4)        | Aicardi-Goutières syndrome 6 (AGS6) | MEGDEL syndrome   |                   |
| OMIM entry      | #263750            |                                                           |                                                  | #601552                                                                                                                              | #201000                      | #262600                                    | #271900                             | #614739           |                   |
| Gene name       | <i>DHODH</i>       |                                                           |                                                  | <i>ASPH</i>                                                                                                                          | <i>RAB23</i>                 | <i>NNT</i>                                 | <i>ADAR</i>                         | <i>SERAC1</i>     |                   |
| dbSNP           | rs201230446        | rs267606766                                               | rs201947120                                      | rs374385878                                                                                                                          | rs121908171                  | rs371979800                                | rs145588689                         | -                 |                   |
| European origin | NHLBI EA           | 0.00061 (5/8232)                                          | 0.00012 (1/8302)                                 | 0.00024 (2/8362)                                                                                                                     | 0.000116 (1/8600)            | 0.000233 (2/8590)                          | 0.000116 (1/8600)                   | 0.00372 (32/8600) | 0.000121 (1/8254) |
|                 | 1000 Genomes EUR   | 0 (0/758)                                                 | 0 (0/758)                                        | 0 (0/758)                                                                                                                            | 0 (0/758)                    | 0.00264 (2/758)                            | 0 (0/758)                           | 0.00132 (1/758)   | 0 (0/758)         |
|                 | p-value            | 1                                                         | 1                                                | 1                                                                                                                                    | 1                            | <b>0.031</b>                               | 1                                   | 0.45              | 1                 |
| African origin  | NHLBI AA           | 0 (0/3790)                                                | 0 (0/3878)                                       | 0 (0/4052)                                                                                                                           | 0 (0/4406)                   | 0.00454 (2/4404)                           | 0 (0/4406)                          | 0.00204 (9/4406)  | 0 (0/4264)        |
|                 | 1000 Genomes AFR   | 0 (0/492)                                                 | 0 (0/492)                                        | 0 (0/492)                                                                                                                            | 0 (0/492)                    | 0 (0/492)                                  | 0 (0/492)                           | 0 (0/492)         | 0 (0/492)         |
|                 | p-value            | 1                                                         | 1                                                | 1                                                                                                                                    | 1                            | 1                                          | 1                                   | 0.65              | 1                 |
